# Supplementary material for: Toughening of an epoxy thermoset with poly[styrene-alt-(maleic acid)]-block-polystyrene-block-poly(n-butyl acrylate) reactive core–shell particles
Source: Royal Society of Chemistry journal article supplement (doi:10.1039/c6ra05048d), 2016-01-01
Supplement: c6ra05048d1.pdf [file c6ra05048d1.pdf]

### Supporting Information

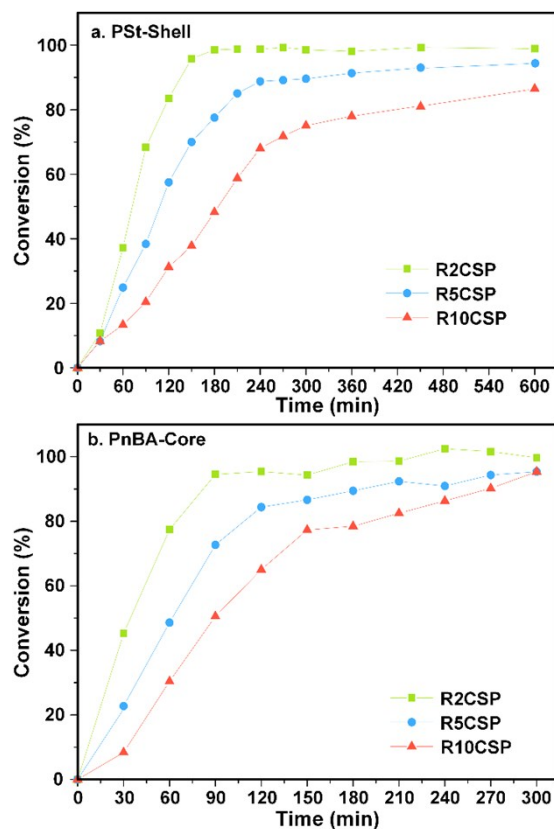

**Figure S1.** Conversion versus time curves of (a) styrene shell monomer, and (b) (n-butyl acrylate) core monomer.

**Table S1.**  $M_n$  and PDI of non-crosslinked RCSPs synthesized via RAFT emulsion polymerization.

| Stage   | MacroRAFT Agent |       | Diblock Copolymer |       | Triblock Copolymer |       |
|---------|-----------------|-------|-------------------|-------|--------------------|-------|
|         | $M_n$ (kDa)     | Mw/Mn | $M_n$ (kDa)       | Mw/Mn | $M_n$ (kDa)        | Mw/Mn |
| R2CSP'  | 1.7             | 1.05  | 19.9              | 1.08  | 60.8               | 2.41  |
| R5CSP'  | 4.5             | 1.18  | 23.5              | 1.09  | 64.2               | 2.68  |
| R10CSP' | 9.4             | 1.56  | 26.2              | 1.62  | 69.8               | 2.67  |

All data are monitored by GPC using RI detector.

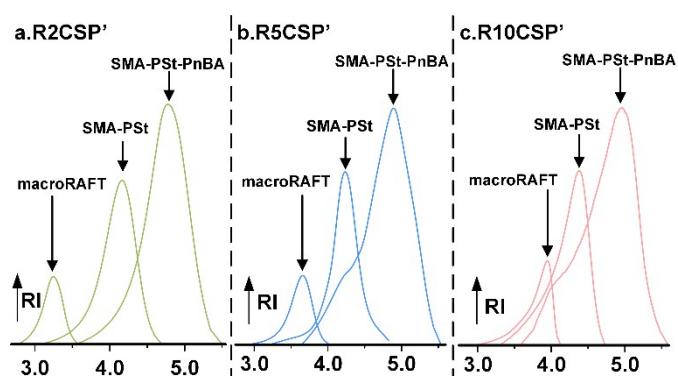

**Figure S2.** GPC curves before and after chain extensions during the synthesis of (a) R2CSP', (b) R5CSP', and (c) R10CSP'. The apostrophe indicate that block copolymers here are not crosslinked.

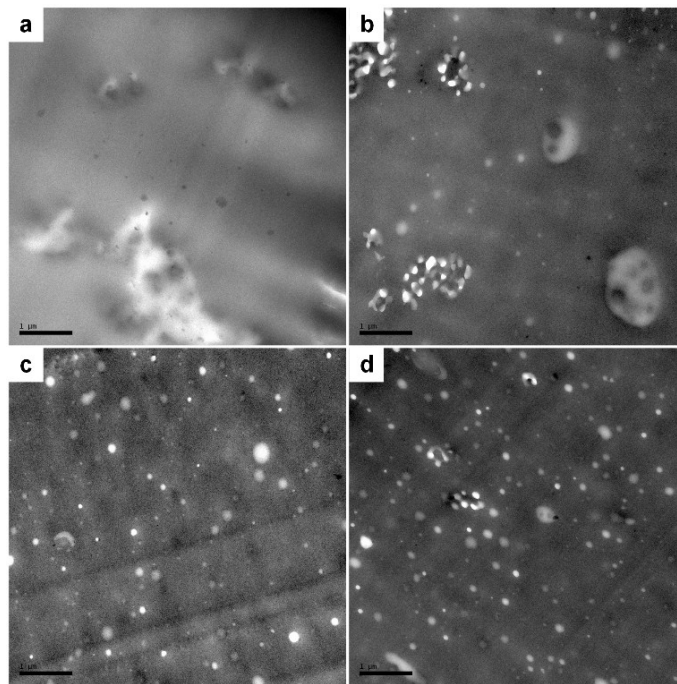

**Figure S3.** TEM photographs of epoxy thermosets containing 10 wt% of (a) ROCSP, (b) R2CSP, (c) R5CSP, and (d) R10CSP. Scale bar is 1000 nm.
